# Supplementary material for: Borophene's tryst with stability: exploring 2D hydrogen boride as an electrode for rechargeable batteries
Source: Royal Society of Chemistry journal article supplement (doi:10.1039/c8cp03686a), 2018-01-01
Supplement: c8cp03686a1.pdf [file c8cp03686a1.pdf]

## Supplementary Information

### Borophene's Tryst with Stability: Exploring 2D Hydrogen Boride as Electrode for Rechargeable Batteries

Vivekanand Shukla,<sup>a</sup> Rafael B. Araujo,<sup>a</sup> Naresh K. Jena,<sup>a,\*</sup> Rajeev Ahuja<sup>a,b,\*</sup>

<sup>a</sup>Condensed Matter Theory Group, Materials Theory Division, Department of Physics and Astronomy, Uppsala University, Box 516, SE-751 20, Uppsala, Sweden

<sup>b</sup>Applied Materials Physics, Department of Materials and Engineering, Royal Institute of Technology (KTH), SE-100 44, Stockholm, Sweden

\*Corresponding author email: NKJ (jenanaresh@gmail.com, [Naresh.Jena@physics.uu.se](mailto:Naresh.Jena@physics.uu.se)) ;  
RA ([Rajeev.Ahuja@physics.uu.se](mailto:Rajeev.Ahuja@physics.uu.se))

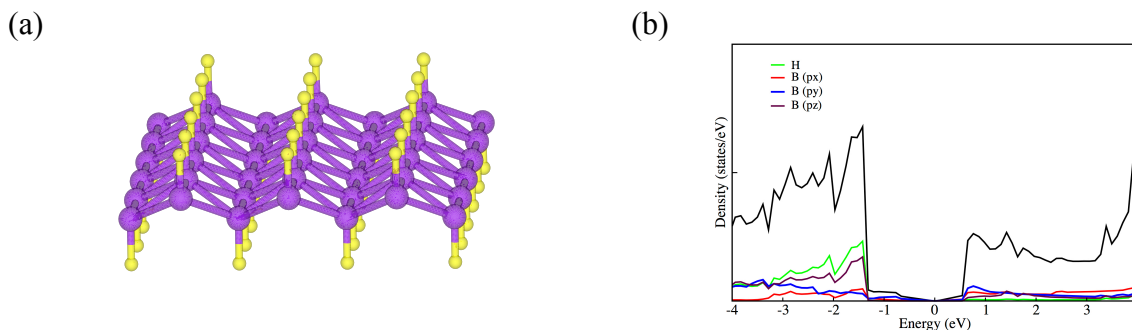

Figure S1: Structure (a) and (b) Projected density of states for computationally predicted hydrogen boride (c-HB)

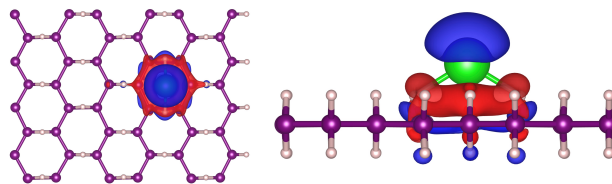

Figure S2. Charge density difference plots for Na-atom adsorption on HB (top and side views; Isosurface value is 0.002 a.u.; isosurface colors: red for electron sufficient and blue for electron deficient regions).

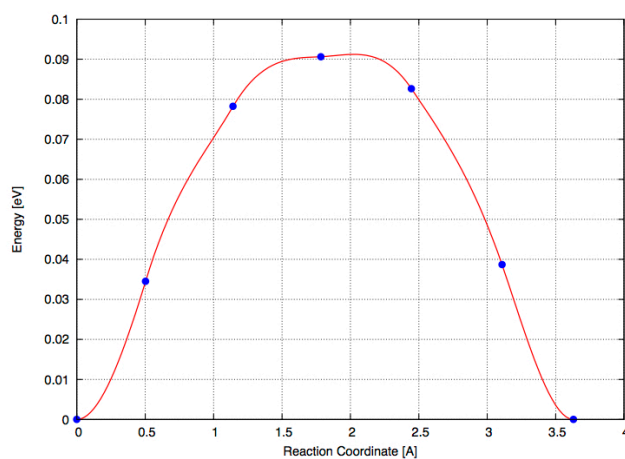

Figure S3. Minimum energy path for Na diffusion on 2D HB
